# Supplementary material
Source: HighWire-hosted journal article supplement (http://www.qdcxjkg.com/highwire/filestream/113101/field_highwire_adjunct_files/1/PareekMetalERJ-01058-2010onlinesupplementaryinformationsupplementarytable1.pdf)
Supplement: PareekMetalERJ-01058-2010onlinesupplementaryinformationsupplementarytable1.pdf [file PareekMetalERJ-01058-2010onlinesupplementaryinformationsupplementarytable1.pdf]

**Supplementary table 1. Numbers of cases of active and latent TB identified amongst those primary care organisations in the UK amongst those organisations that reported both the numbers being screened and the yield for active or latent TB<sup>1</sup>**

|                                                               | <b>Overall (n=64)</b> |
|---------------------------------------------------------------|-----------------------|
| <b>Numbers screened<sup>2</sup><br/>(median, IQR)</b>         | 60.0 (22.5-195)       |
| <b>Number of active TB cases identified<br/>(median, IQR)</b> | 0 (0.0-0.78)          |
|                                                               |                       |
|                                                               | <b>Overall (n=38)</b> |
| <b>Numbers screened<sup>3</sup><br/>(median, IQR)</b>         | 104.5 (30.0-300.0)    |
| <b>Number of latent TB cases identified<br/>(median, IQR)</b> | 7.8 (3.0-30.0)        |

<sup>1</sup>This data will be slightly different to that reported in the text because it only includes those organisations that provided data on both the numbers screened annually and the percentage yield for active (n=64 instead of 65 as in the text because one primary care organisation only provided information on the percentage yield for active TB and not the numbers screened) and latent tb (n=38 instead of 40 as in the text because two primary care organisations only provided information on the percentage yield for latent TB and not the numbers screened)

<sup>2</sup>This refers to the median total number of new-entrants screened by those primary care organisations that screen for active TB (ie. screen individuals with abnormal chest radiographs) and are also able to provide data on both the numbers screened and the yield for active TB (n=64).

<sup>3</sup>This refers to the median total number of new-entrants screened by those primary care organisations that screen for latent TB (ie. screen port 102 forms (CXR inconclusive/has not been undertaken) and/or port 101 forms (CXR normal) and/or new-entrants identified through primary-care registrations and are also able to provide data on both the numbers screened and the yield for latent TB (n=38).
